# Supplementary material for: Targeting TRIP13 in favorable histology Wilms tumor with nuclear export inhibitors synergizes with doxorubicin
Source: PubMed Central journal article supplement (PMC11001930; doi:10.1038/s42003-024-06140-6), 2024-04-08
Supplement: 42003_2024_6140_MOESM2_ESM.pdf [file 42003_2024_6140_MOESM2_ESM.pdf]

**Supplementary Figure 1: Correlation between shRNA and sgRNA loss of function screens among biological replicates.**

RNAi screens by cell lines represented in (a). Correlations of RNAi screens in (b) PEDS\_0002T, (c) PEDS\_0041\_T1, (d) PEDS\_0041\_T2. CRISPR-Cas9 screens used early and late passages to determine change in abundance of sgRNAs summarized by cell lines in (e). as shown in f-k. (f) PEDS\_0002T early passage, (g) PEDS\_0002T late passage, (h) PEDS\_0023\_T1 early passage, (i) PEDS\_0023\_T1 late passage, (j) PEDS\_0023\_T2 early passage, (k) PEDS\_0023\_T2 late passage. Right color gradient delineates the Pearson's correlation with anticorrelation as red and correlation as blue.

**a****RNAi**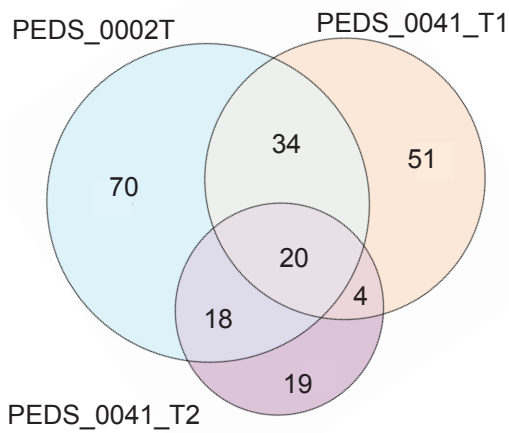**b**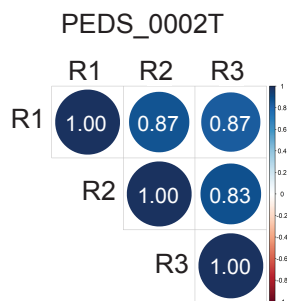**c**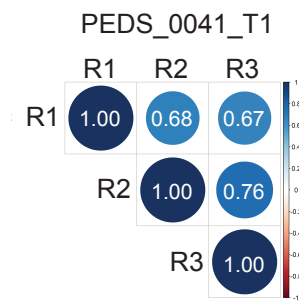**d**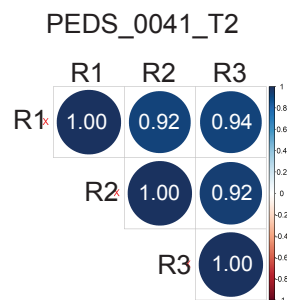**e****CRISPR-Cas9**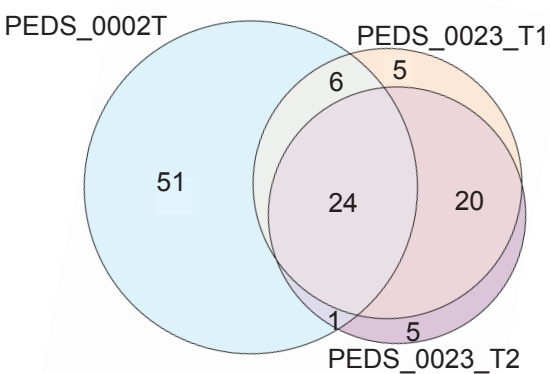**f**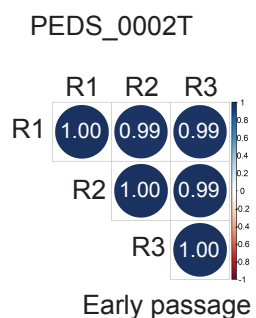**g**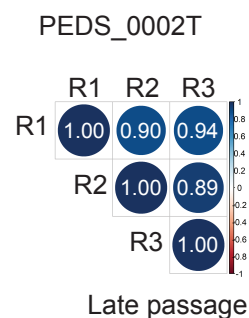**h**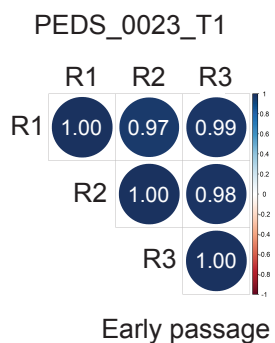**i**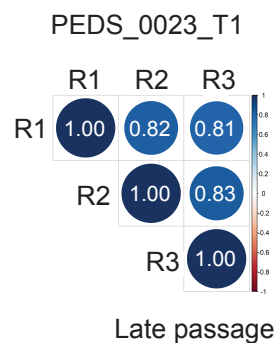**j**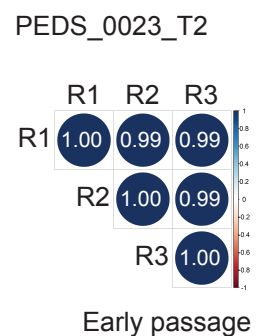**k**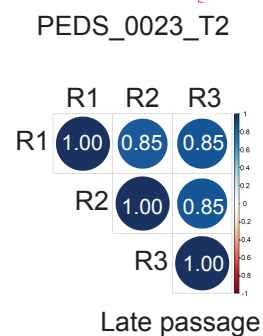

**Supplementary Figure 2: Inhibition of nuclear export in FHWT by KPT-330 or shXPO1.**

(a) Suppression of XPO1 by immunoblot (b) Change in viability using shXPO1 across FHWT cell lines as compared to shControl. \* p-value <0.05, \*\* p-value <0.005, \*\*\* p-value <0.0005. Error bars represent mean  $\pm$  SD. (c) Additional replicate of the KPT-330 treated (5 $\mu$ M treat for 48 hours) Wilms tumor cells across 5 different cell lines.

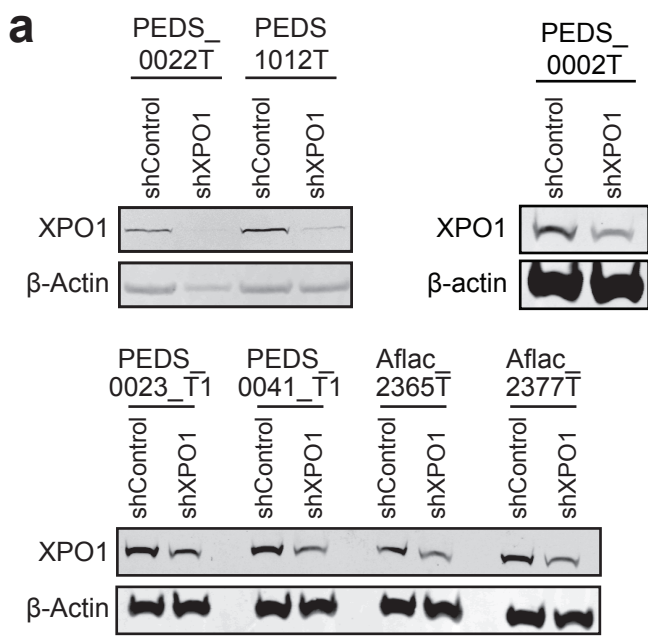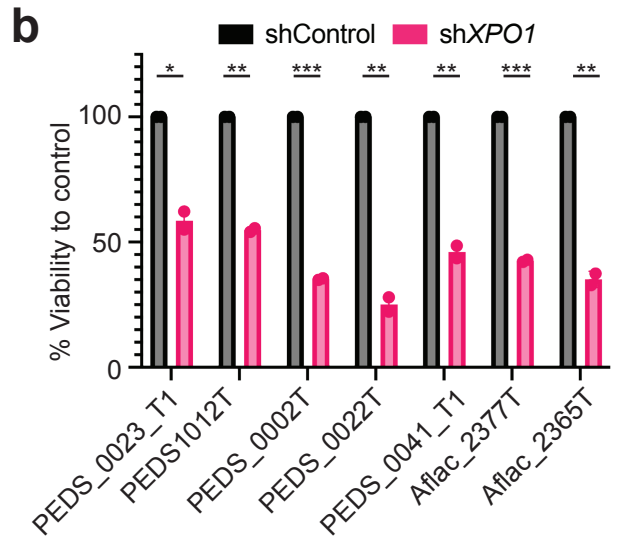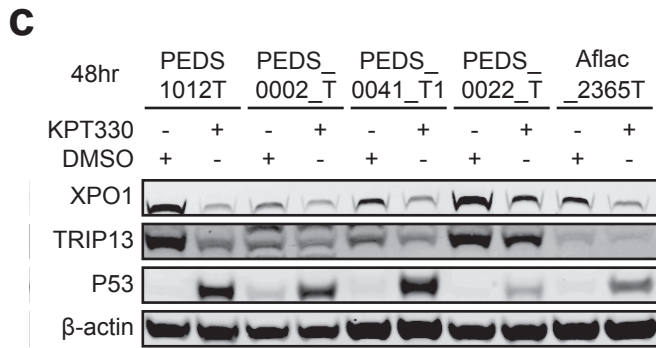

### **Supplementary Figure 3: Dose response curves to KPT-330 across cells lines**

KPT-330 IC<sub>50</sub> data from all cell lines depicted in **Fig 3d**. Matched tumor normal pairs are plotted together for three of the cell lines. Error bars represent mean  $\pm$  SD from two biological replicates.

KPT-330 IC50 Curves

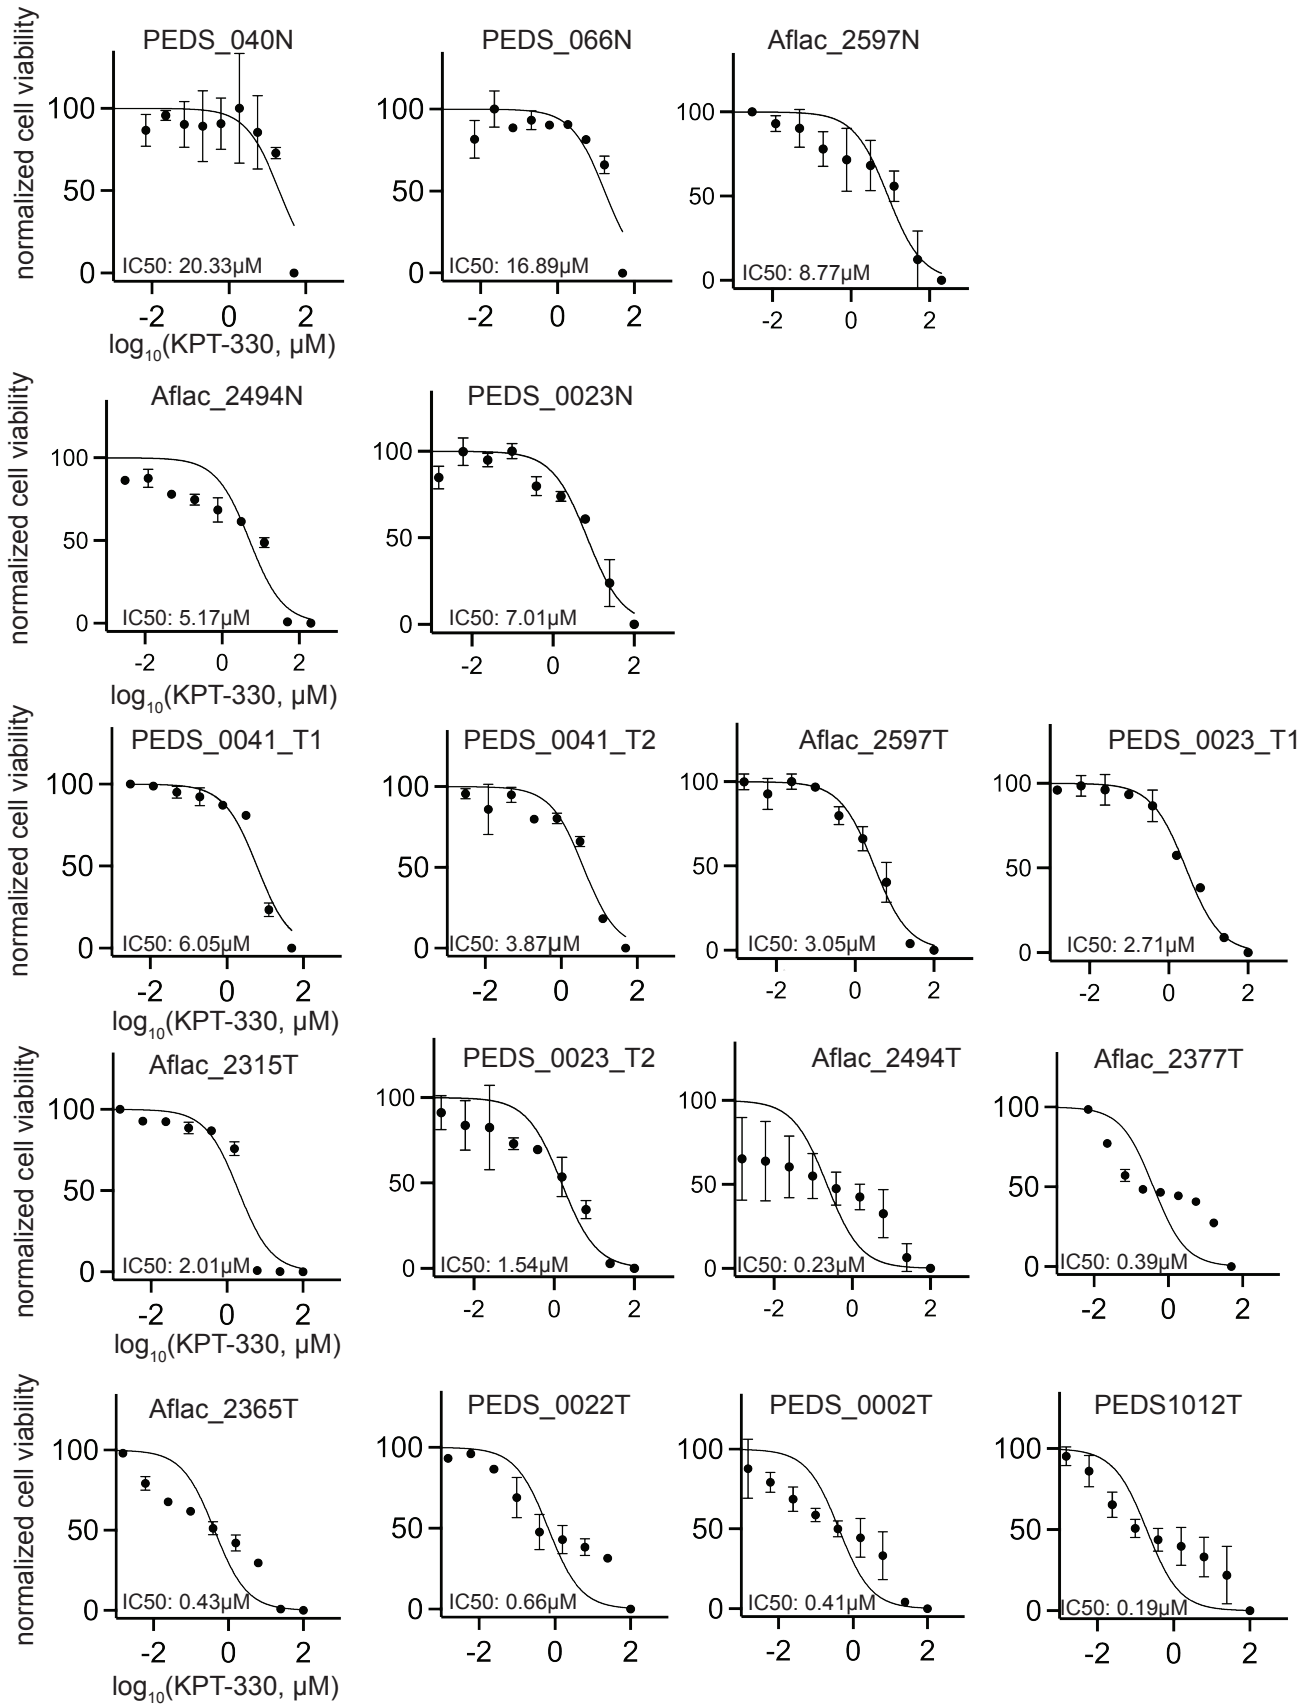

#### **Supplementary Figure 4: Response to KPT-330 Treatment.**

(a) Plot measuring correlation between XPO1 expression levels and corresponding KPT-330 IC50. (b) qRT-PCR analysis of *XPO1* in KPT-330 and DMSO treated cells. Data was normalized by the amount of TBP expressed relative to the corresponding value for all the cells and are means  $\pm$  SD from at least two biological replicates. \* p-value<0.05, all comparisons represent a Student's unpaired two-sided t-test. (c) Cell lines were treated with 5 $\mu$ M of KPT-330 for 24 hours, XPO1/CRM levels are suppressed with accumulation of p53 across a majority of cell lines with exception to PEDS\_0023\_T1 which harbors a TP53 mutation. (d) Normal cell lines were treated with 5 $\mu$ M of KPT-330 for 24 hours and accumulation of p53 was assessed. (e) Immunoblots from Supp Fig 4c and 4d were quantified to determine the accumulation of p53 relative to  $\beta$ -actin, excluding PEDS\_0023\_T1. \*\* p-value<0.005, all comparisons represent a Student's t-test.

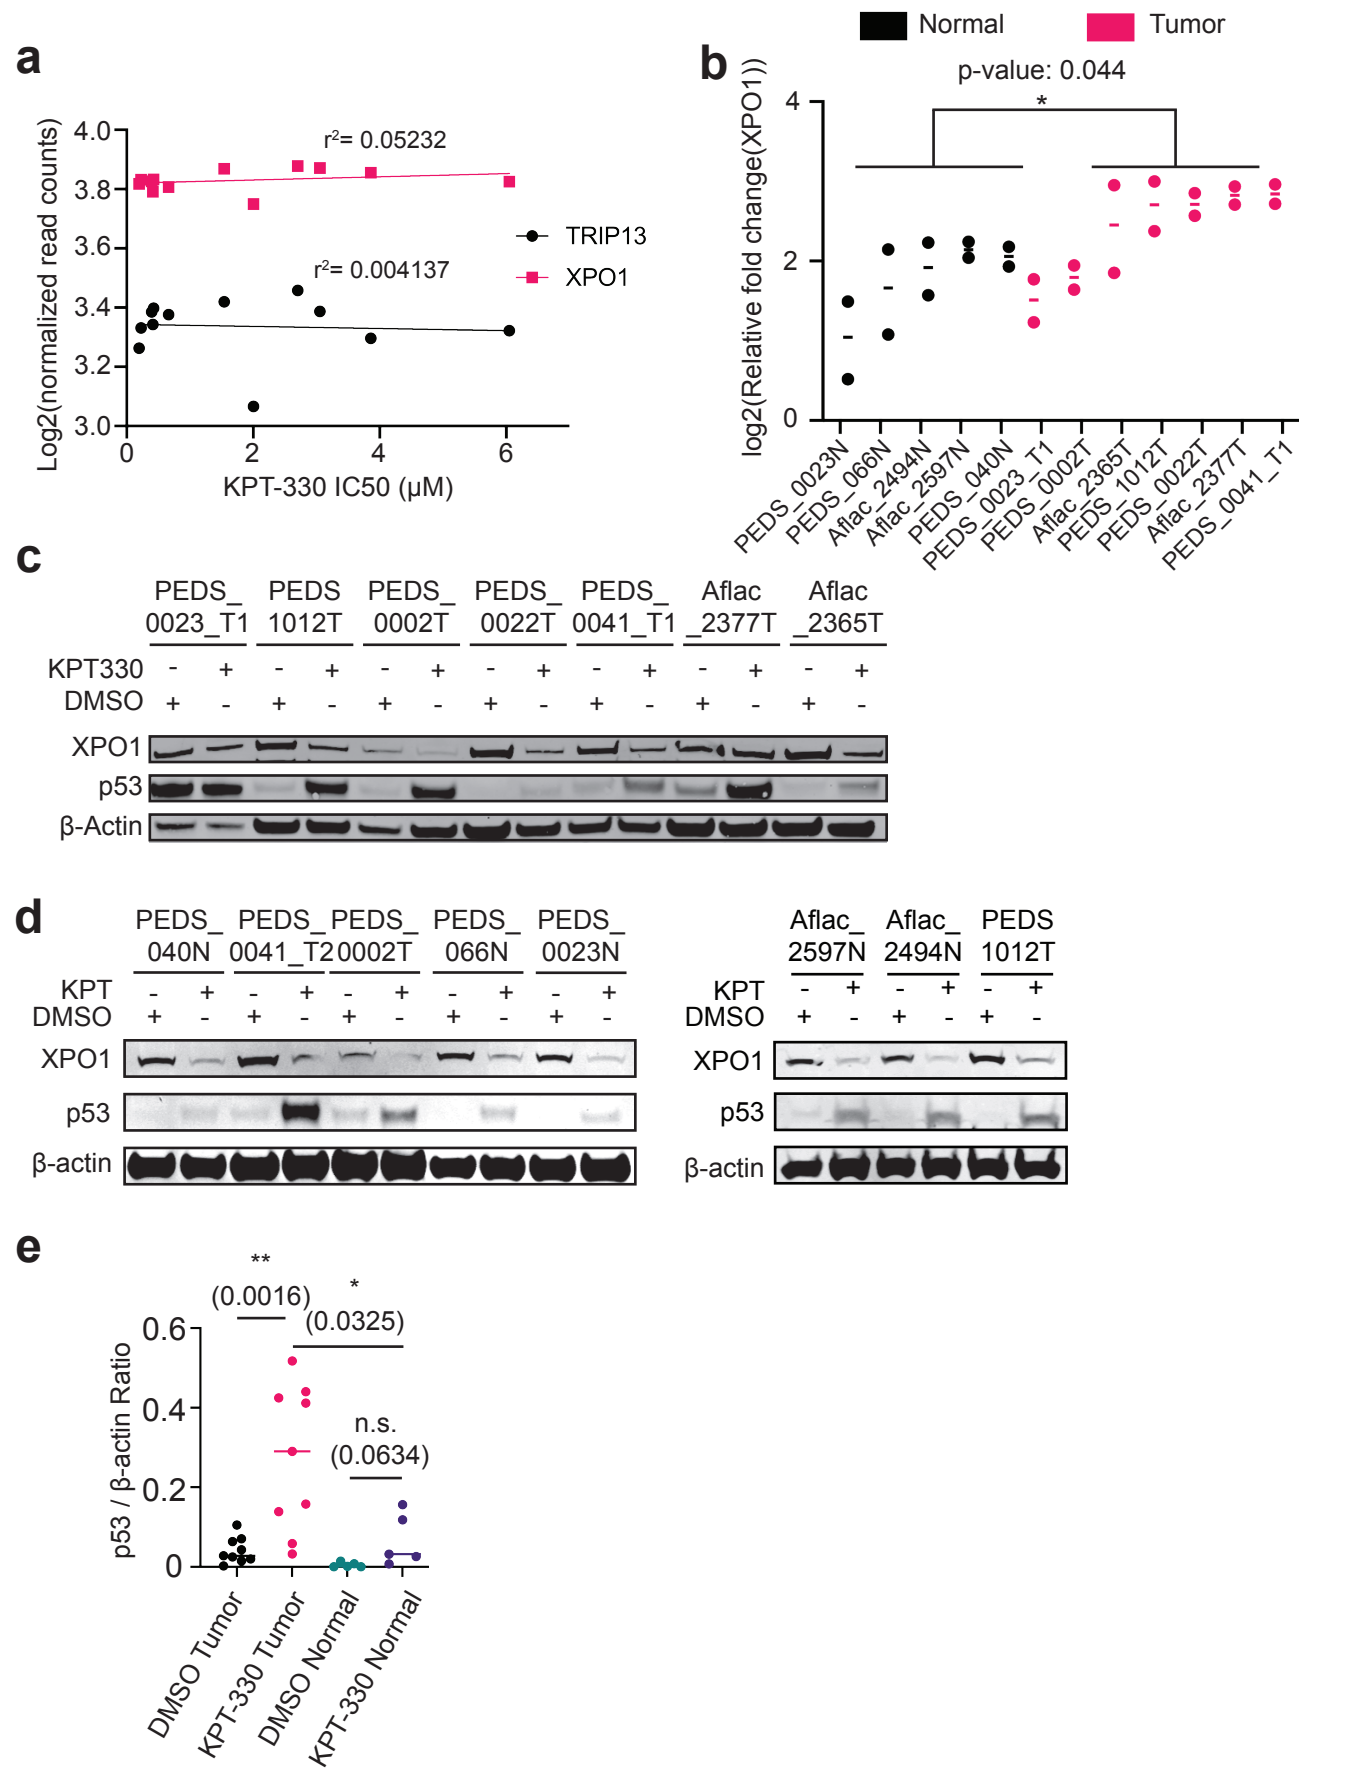



**Supplementary Figure 5: Inhibition of nuclear export and TRIP13 in FHWT cell lines.**

(a) Immunoblots depicting the decrease in protein levels of XPO1 in the cytoplasmic lysates and nuclear accumulation of p53 in the nuclear lysates upon treatment with KPT-330 at 24 hr. (b) We introduced sgRNAs targeting either LacZ or TP53 and confirmed increase in p53 following treatment with KPT-330 in the LacZ controls. (c) Dose-response curves for the sgTP53 and sgLacZ cells for KPT-330 in PEDS\_0022T. Error bars represent mean  $\pm$  SD and represent biological replicates. (d) Dot plots representing the expression levels of TRIP13 in Wilms tumor when compared with the normal matched kidney tissue. Immunoblot depicting suppression of TRIP13 in (e) CCLF\_PEDS1012T (f) CCLF\_PEDS\_0022T, and (g) Aflac\_2377T. (h) Overexpression of TRIP13 leads to modest increase in proliferation as compared to luciferase. (i) p53 and p21 protein levels increase while TRIP13 levels decrease upon KPT-330 treatment in TP53 wildtype cells.

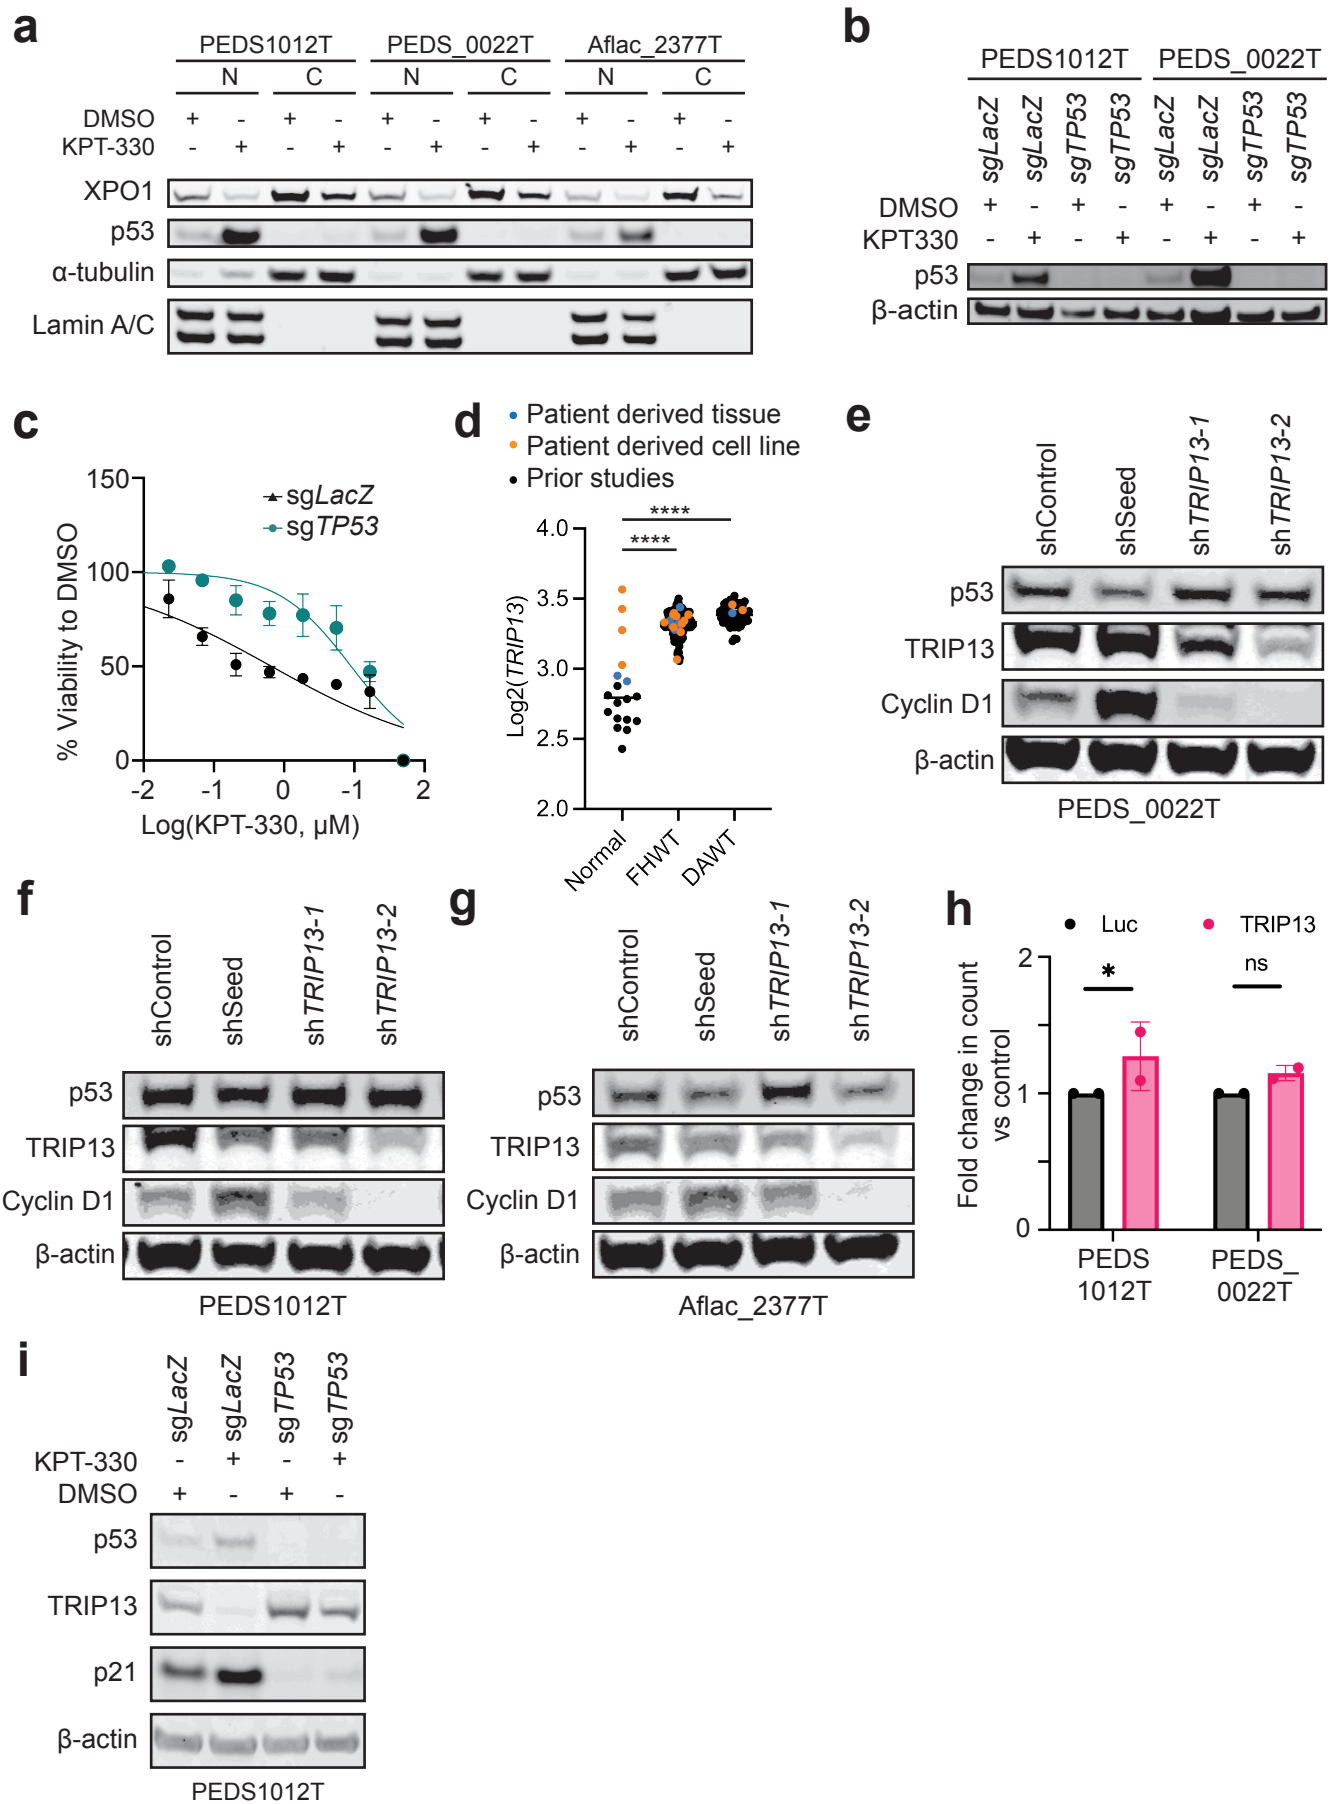

### **Supplementary Figure 6: Dose response curves to doxorubicin across cells lines**

Wilms tumor response to doxorubicin treatment. Doxorubicin IC50 data from all cell lines depicted in **Fig 5b**. Matched tumor normal pairs are plotted together for three of the cell lines. Error bars represent mean  $\pm$  SD from two biological replicates.

# Doxorubicin IC50 Curves

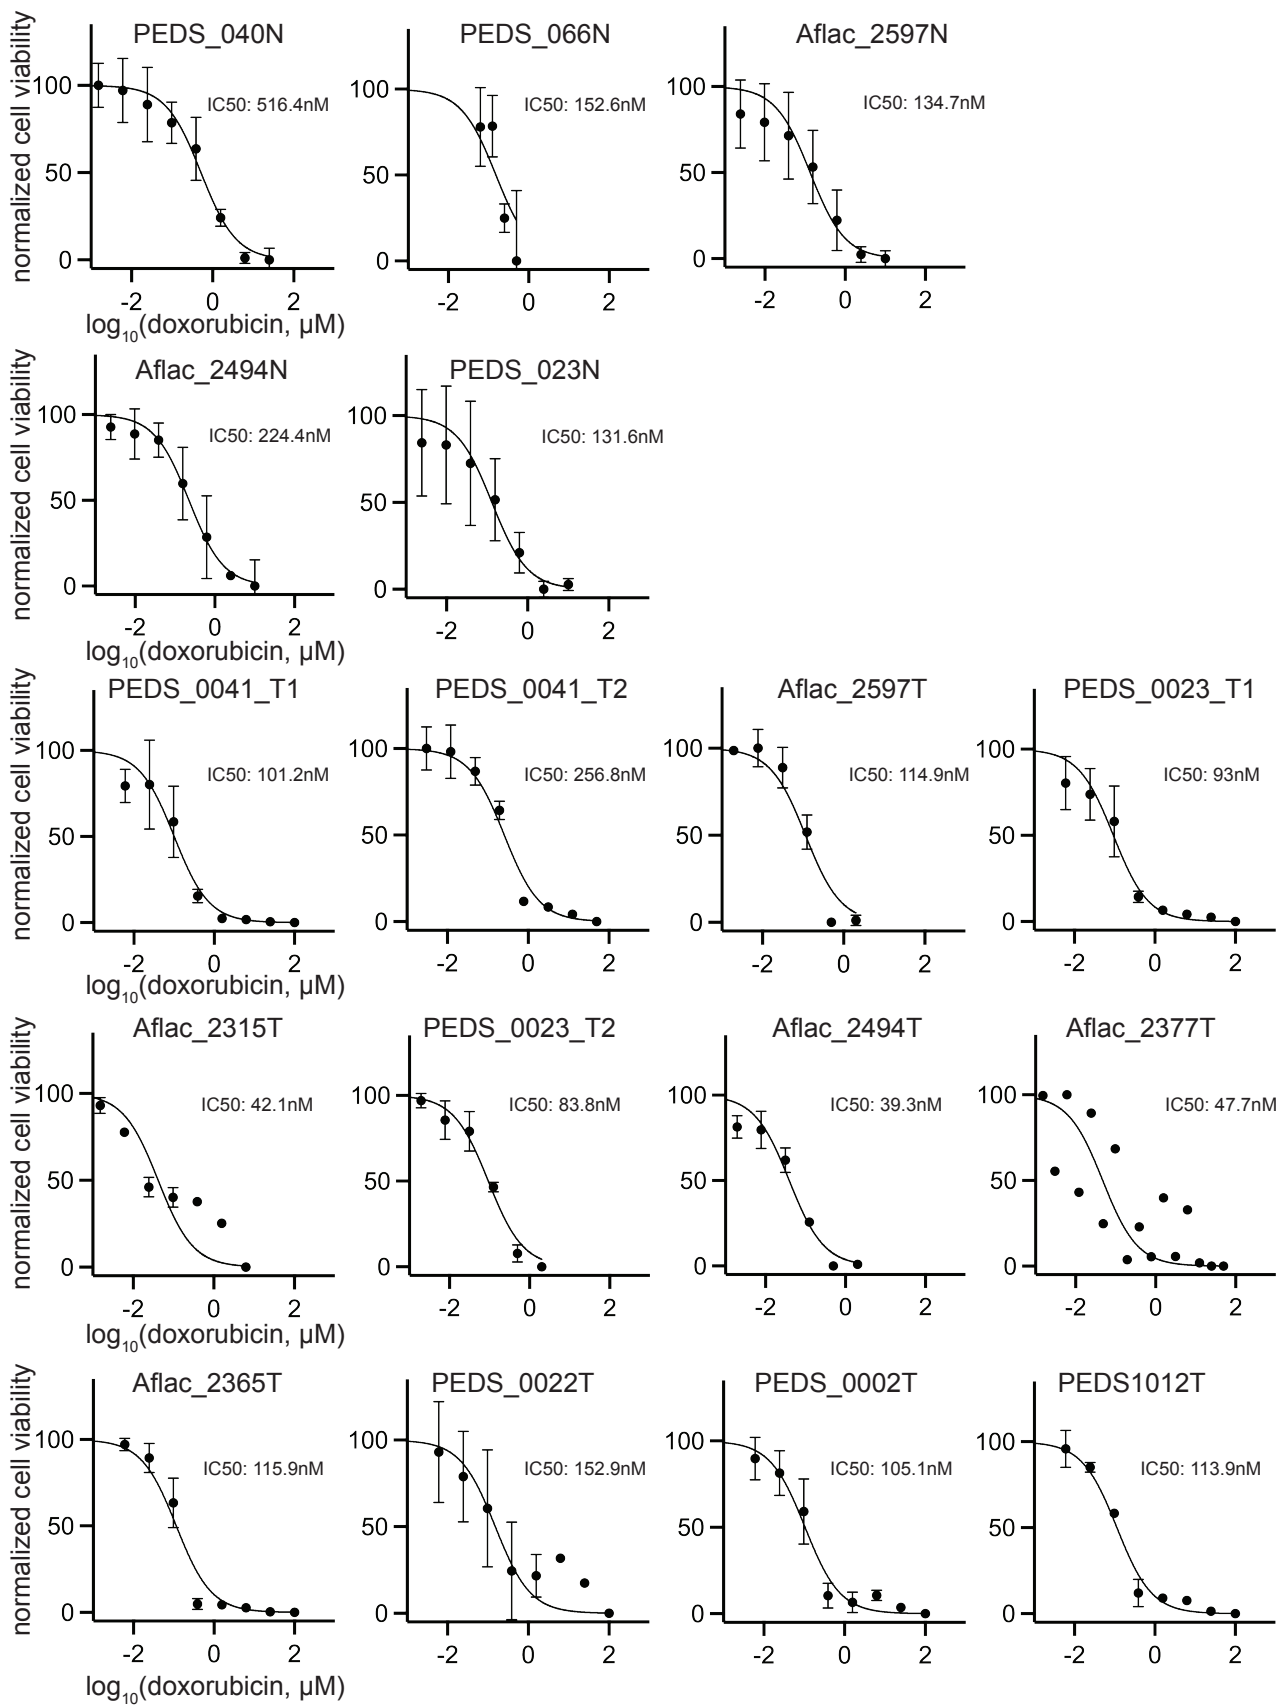

## Supplementary Figure 7: Gating Strategy for Flow Cytometry

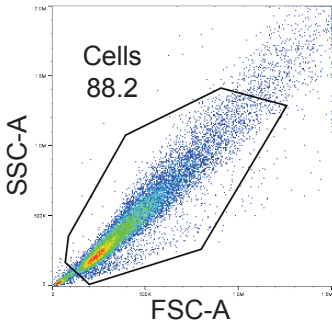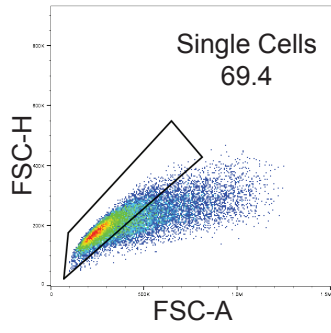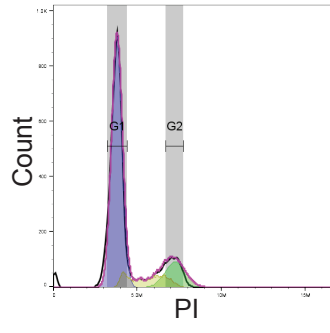

**RMSD: 4.89**  
**%G1: 73.4**  
**%S: 12.3**  
**%G2: 14.3**  
**G1 Mean: 3.77E6**  
**G2 Mean: 7.26E6**  
**G1 CV: 11.9**  
**G2 CV: 11.9**  
**% less G1: 4.10**  
**% greater G2: -0.93**

**Supplementary Figure 8: The full, unedited blots in Figures.**

Fig 3e

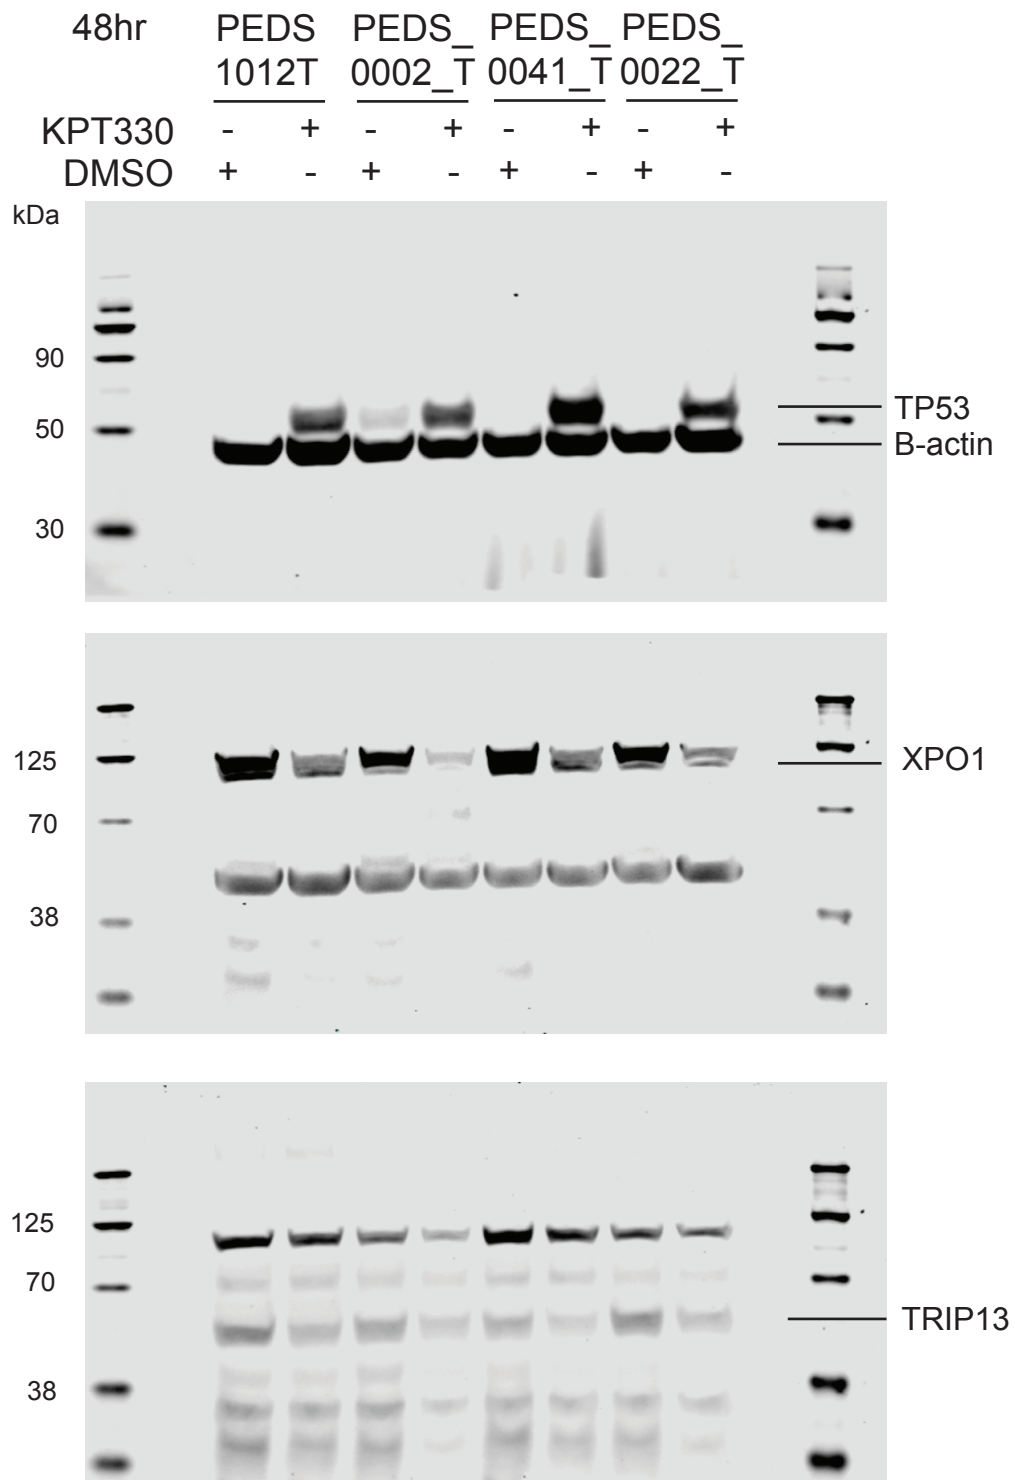





Fig S2C

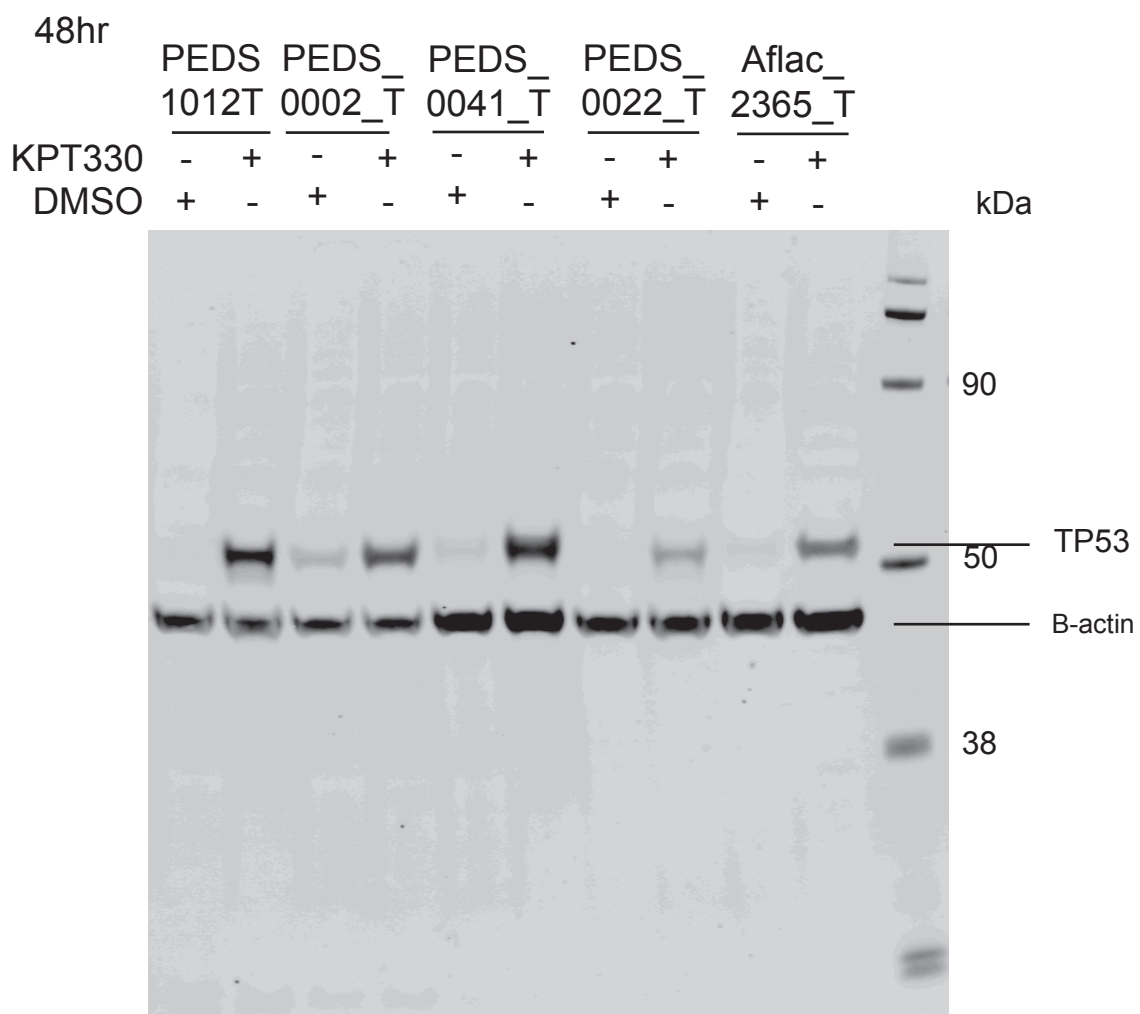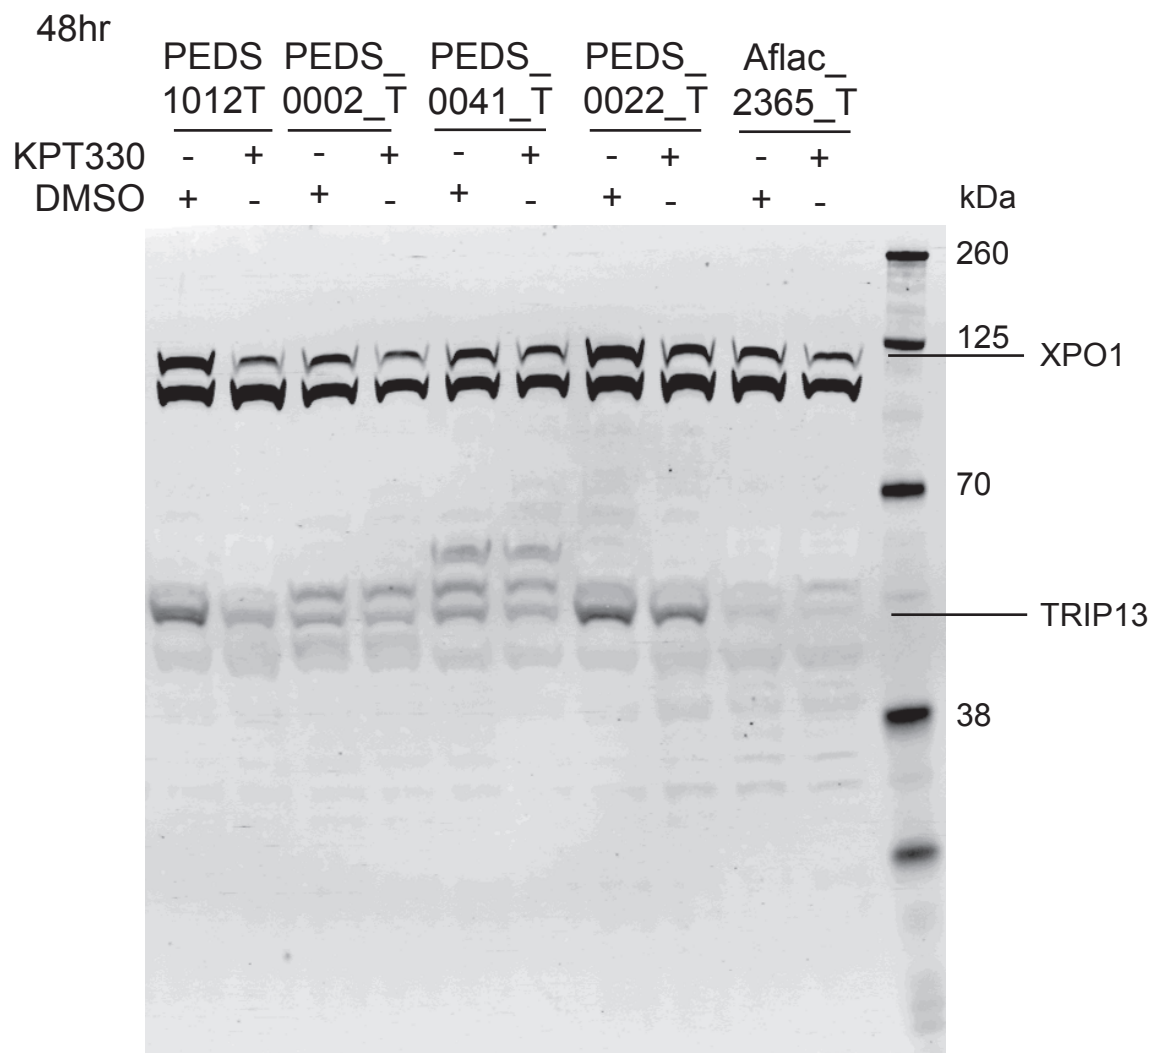

Fig S4C

|        | PEDS_0023_T |   | PEDS_1012T |   | PEDS_0002_T |   | PEDS_0022_T |   | PEDS_0041_T1 |   | Aflac_2377T |   | Aflac_2365T |   |
|--------|-------------|---|------------|---|-------------|---|-------------|---|--------------|---|-------------|---|-------------|---|
| KPT330 | -           | + | -          | + | -           | + | -           | + | -            | + | -           | + | -           | + |
| DMSO   | +           | - | +          | - | +           | - | +           | - | +            | - | +           | - | +           | - |

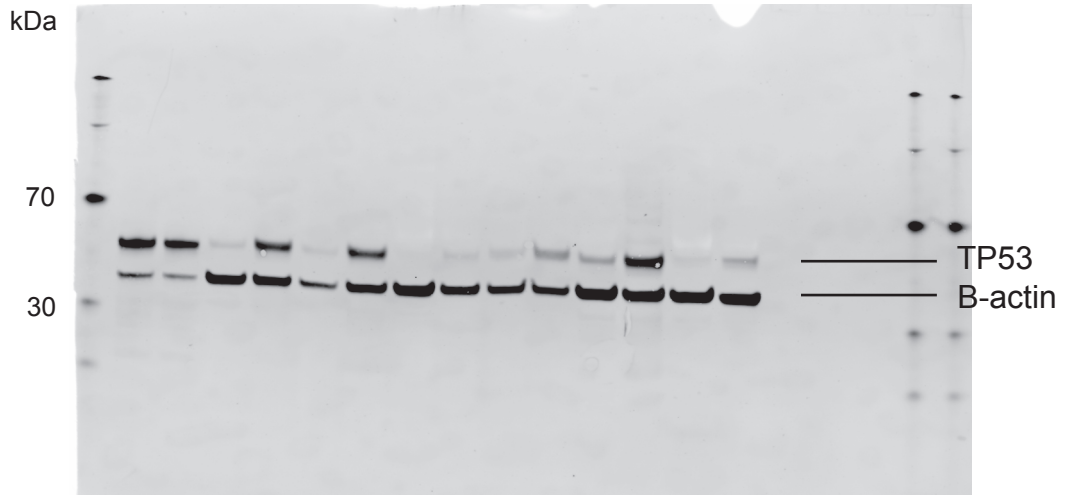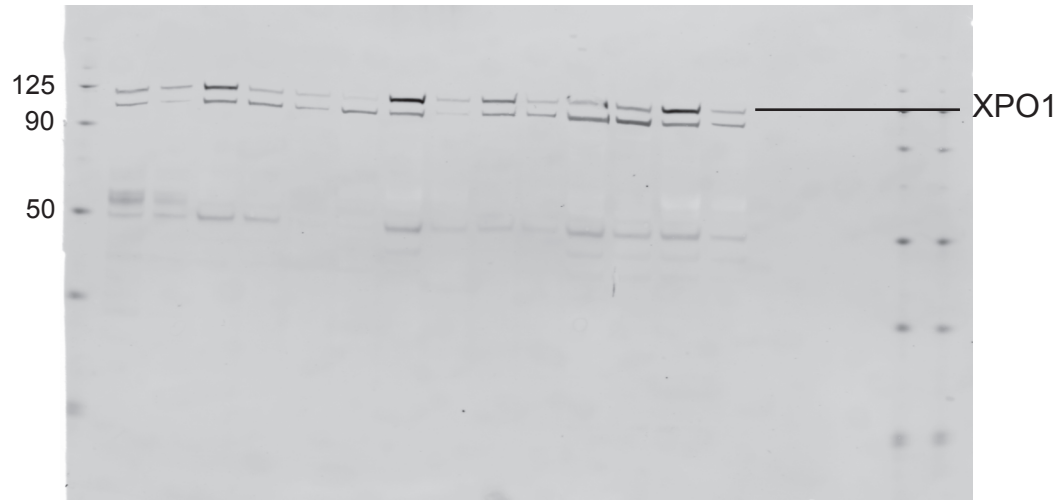

Fig S4D

|      | PEDS_040_N |   | PEDS_0041_T |   | PEDS_0002_T |   | PEDS_066_N |   | PEDS_0023_N |   |
|------|------------|---|-------------|---|-------------|---|------------|---|-------------|---|
| KPT  | -          | + | -           | + | -           | + | -          | + | -           | + |
| DMSO | +          | - | +           | - | +           | - | +          | - | +           | - |

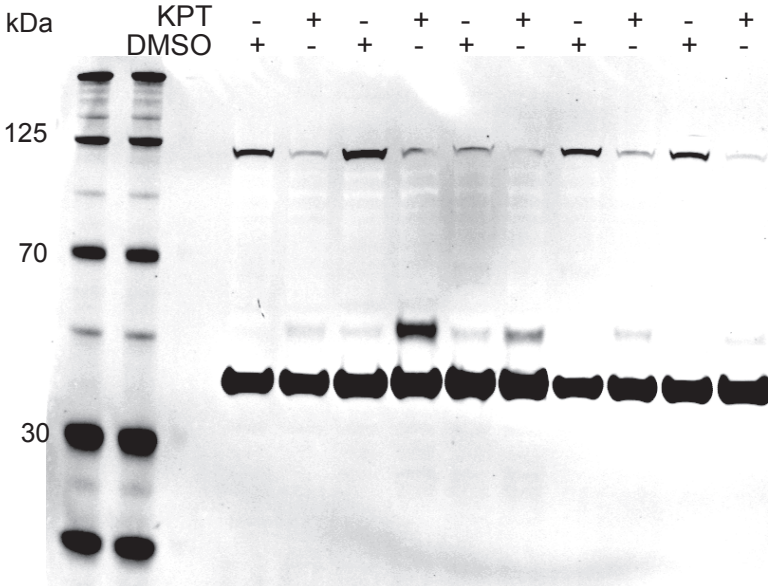

|      | Aflac_2597N |   | Aflac_2494N |   | Peds_1012T |   |
|------|-------------|---|-------------|---|------------|---|
| KPT  | -           | + | -           | + | -          | + |
| DMSO | +           | - | +           | - | +          | - |

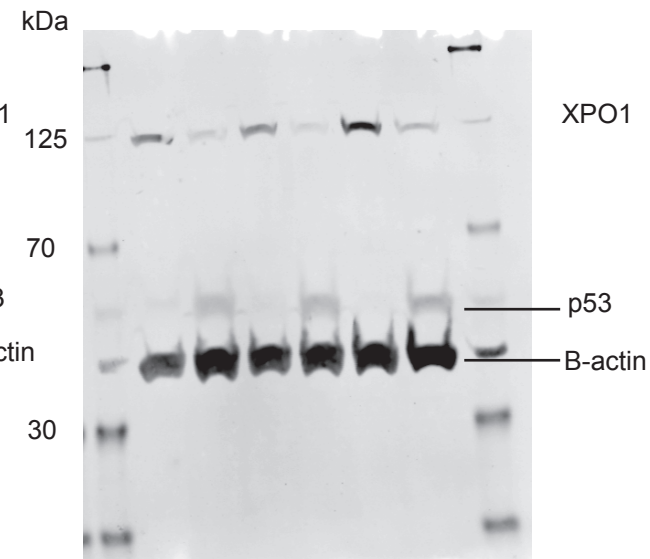

Fig S5A

|         | PEDS1012T |   |   |   | PEDS_0022_T |   |   |   | Aflac_2377T |   |   |   |
|---------|-----------|---|---|---|-------------|---|---|---|-------------|---|---|---|
|         | N         |   | C |   | N           |   | C |   | N           |   | C |   |
| DMSO    | +         | - | + | - | +           | - | + | - | +           | - | + | - |
| KPT-330 | -         | + | - | + | -           | + | - | + | -           | + | - | + |

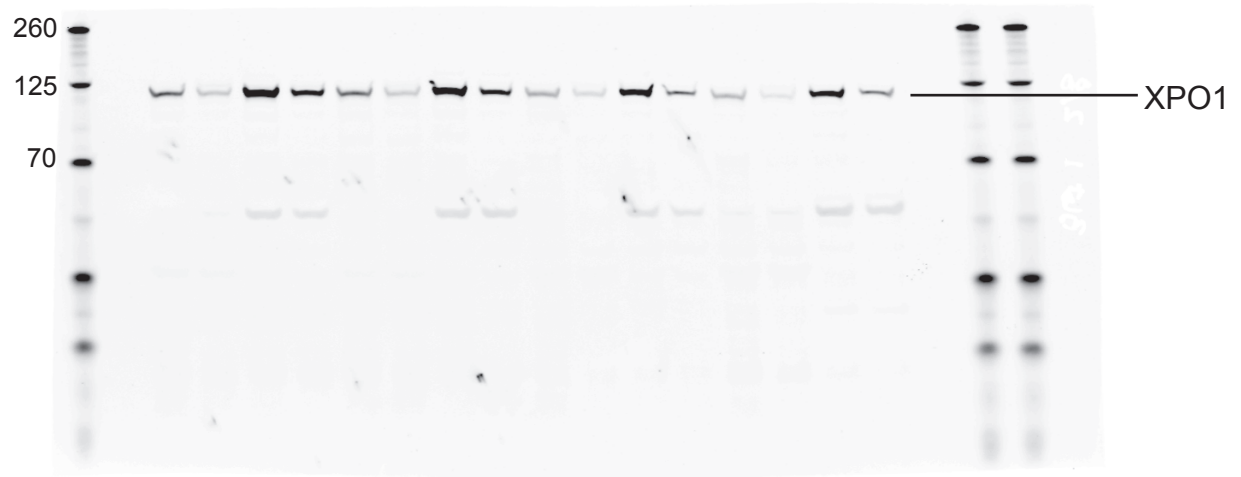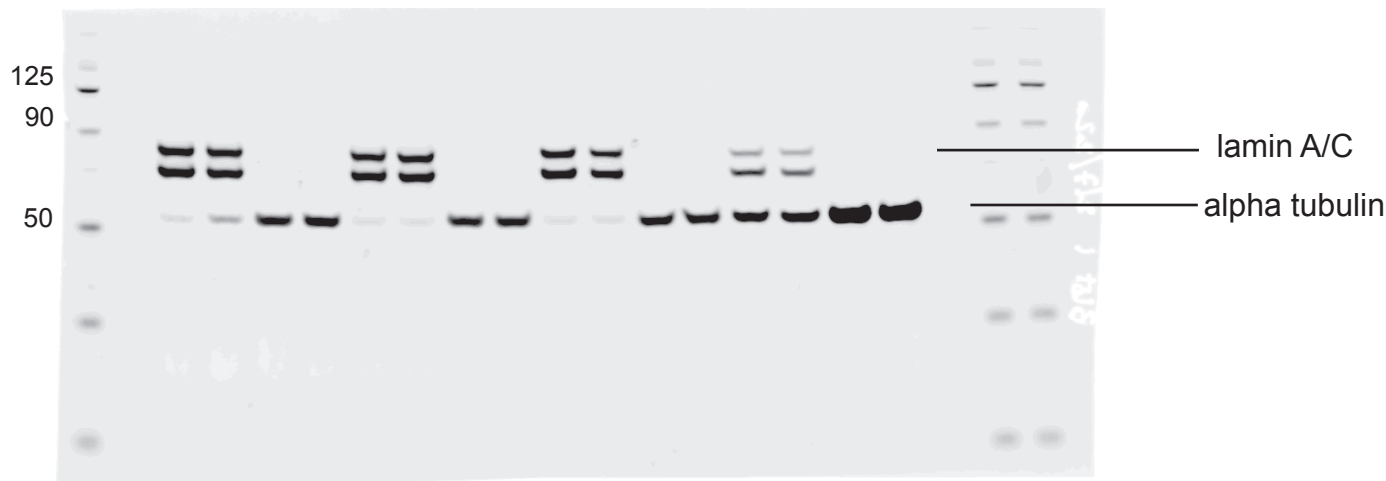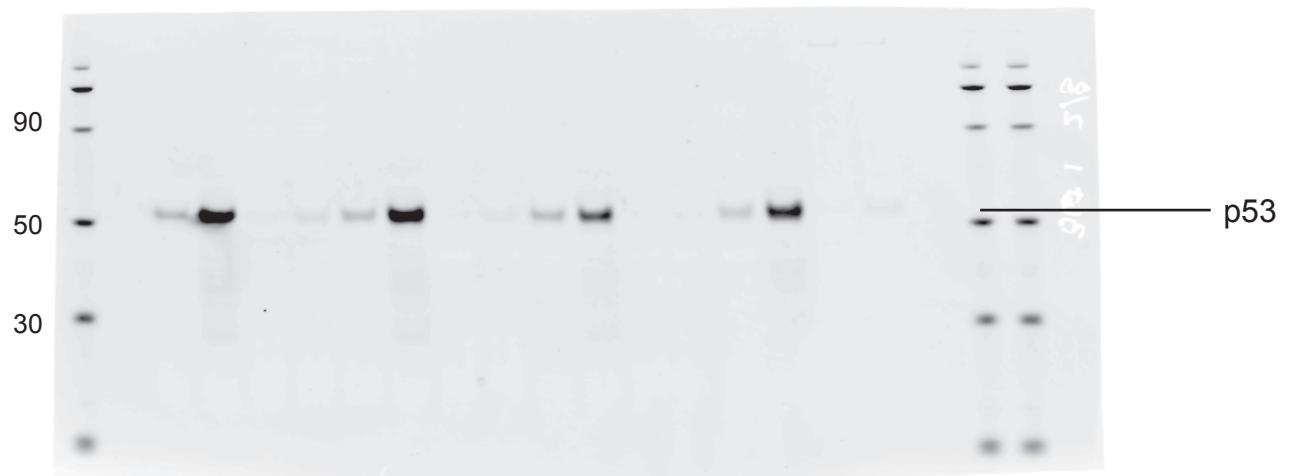

Fig S5b

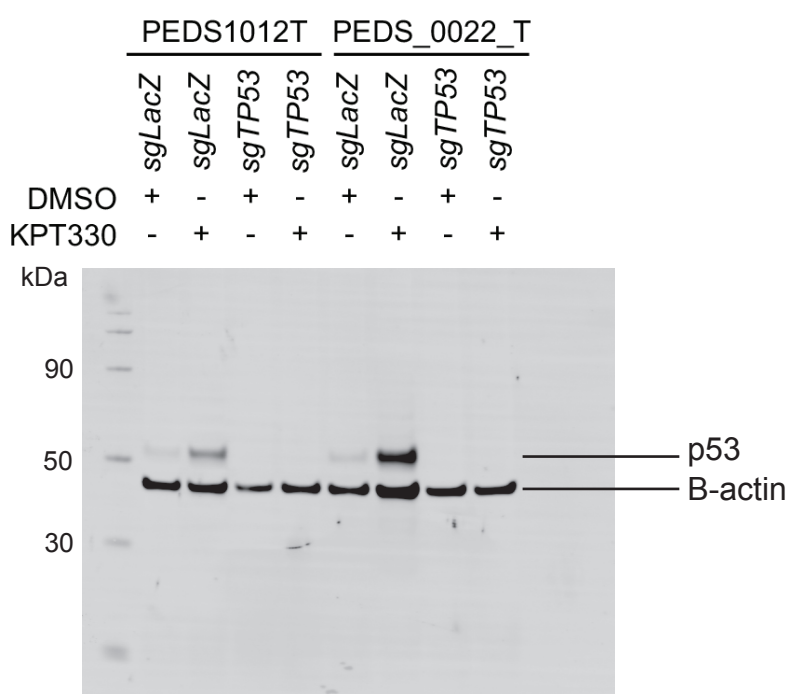

Fig S5e-g

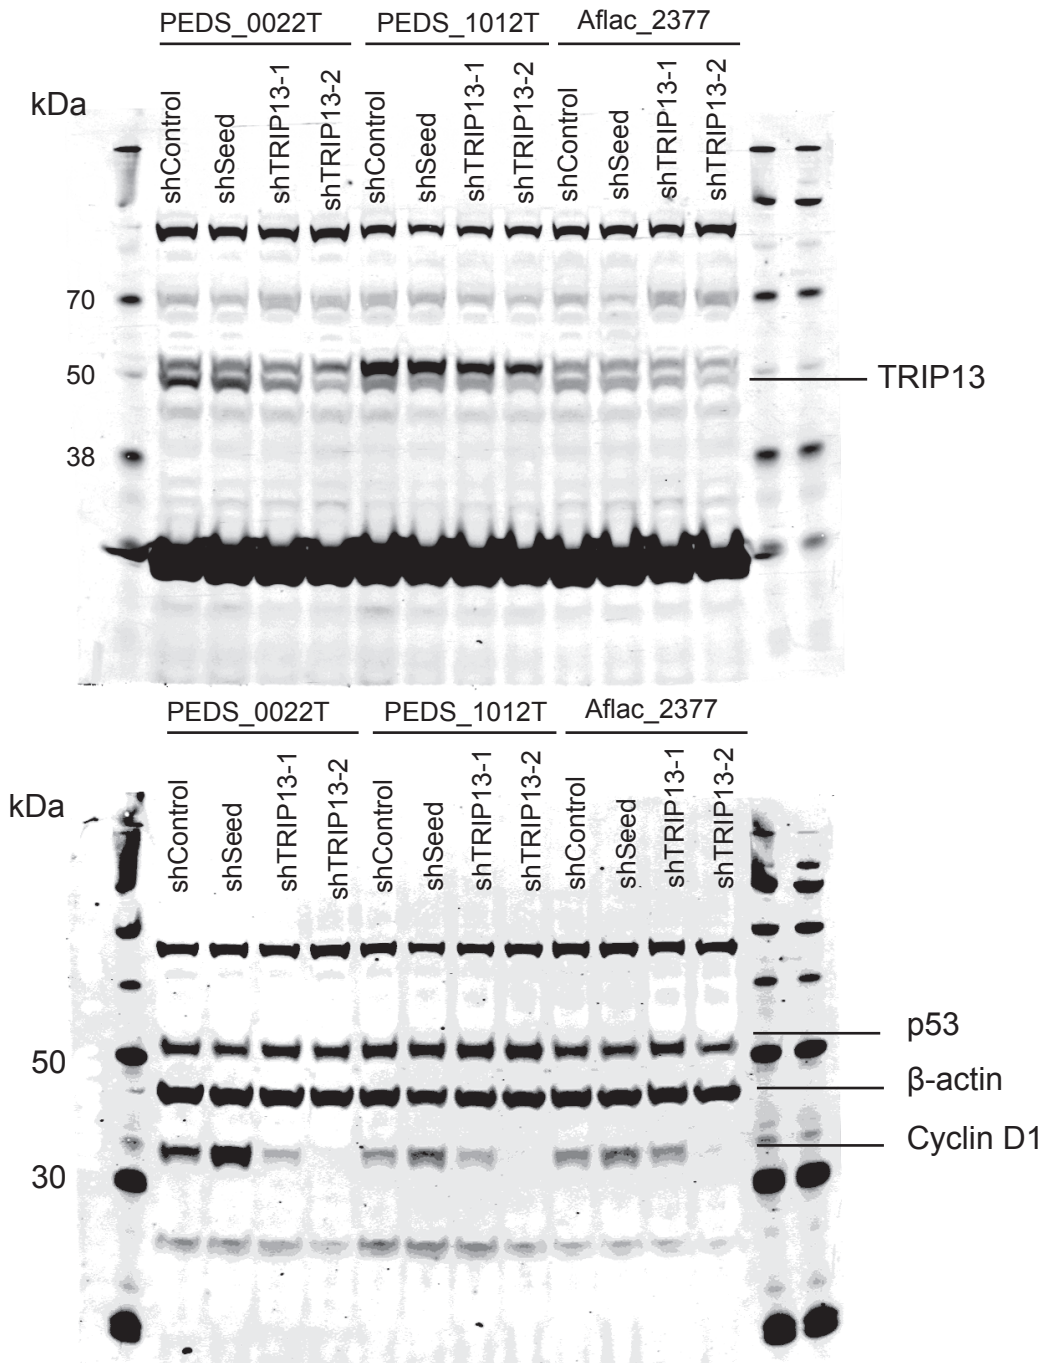

Fig S5I

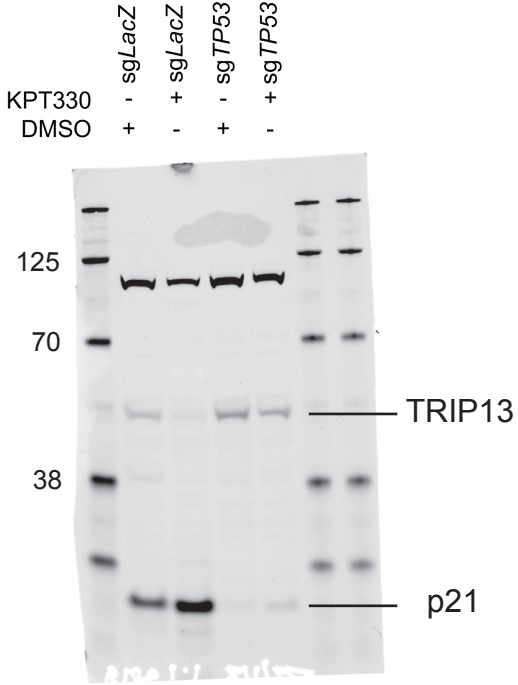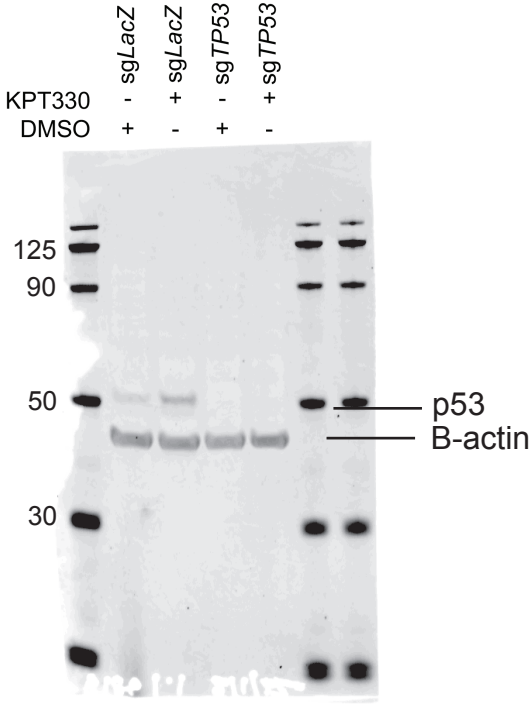

### Supplementary Table 1:F-Media Components

|                          |        |
|--------------------------|--------|
| DMEM                     | 500 mL |
| DMEM:F12                 | 500 mL |
| Hydrocortisone/EGF mix   | 1.0 mL |
| Insulin (5mg/mL)         | 1.0 mL |
| FBS                      | 50 mL  |
| Glutamine                | 10 mL  |
| Pen/Strep                | 5 mL   |
| Cholera Toxin (11.7uM)   | 8.6 uL |
| Y-27632 (ROCK inhibitor) | 0.5 mL |

#### Stock Solutions:

|                                         |                                                                                                              |
|-----------------------------------------|--------------------------------------------------------------------------------------------------------------|
| Hydrocortisone/EGF Mix (Sigma # H-0888) | Dissolve hydrocortisone in 100% ethanol to 0.5 ug/mL. Mix 1 mL of this with 19 mL DMEM containing 2.5 ug EGF |
| Insulin (Sigma # I-550)                 | Dissolve 100 mg insulin in 20 mL of distilled water containing 200 uL glacial acetic acid.                   |
| Cholera Toxin (Sigma # C-8052)          | Dissolve 1 mg of cholera toxin in 1 mL of distilled water                                                    |
| Y-27632 (Selleck S1049)                 | Dissolve to stock concentration of 10 mM                                                                     |

**Supplementary Table 2: Cell Line Passage Information**

| <b>Cell Line</b> | <b>Passages before senesc</b> | <b>Media</b> | <b>Detached with</b> | <b>Passage at RNA Sequencing</b> |
|------------------|-------------------------------|--------------|----------------------|----------------------------------|
| Aflac_2315_T     | 14-15                         | F-media      | TrypLE               | 6                                |
| Aflac_2365_T     | 12-14                         | F-media      | TrypLE               | 9                                |
| Aflac_2377_T     | 14-15                         | F-media      | TrypLE               | 4                                |
| Aflac_2494_N     | 10                            | F-media      | TrypLE               | 3                                |
| Aflac_2494_T     | 38-40                         | F-media      | TrypLE               | 16                               |
| Aflac_2597_N     | 10                            | F-media      | TrypLE               | <5                               |
| Aflac_2597_T     | 9                             | F-media      | TrypLE               | <5                               |
| PEDS_0002_T      | >50                           | F-media      | TrypLE               | 26                               |
| PEDS_0022_N      | 10                            | F-media      | TrypLE               | 5                                |
| PEDS_0022_T      | 30                            | F-media      | TrypLE               | 19                               |
| PEDS_0023_T      | 28-32                         | F-media      | TrypLE               | 7                                |
| PEDS_0023_T2     | 25-30                         | F-media      | TrypLE               | 8                                |
| PEDS_0041_T1     | 14-15                         | F-media      | TrypLE               | 7                                |
| PEDS_0041_T2     | 10                            | F-media      | TrypLE               | 5                                |
| PEDS1012T        | 40-45                         | F-media      | TrypLE               | 24                               |



**Supplementary Table 3: FACS data**

| <b>PEDS_1012T</b> | G1   |      |      | S    |      |      | G2   |      |      | < G1 |      |      | > G2 |       |      |
|-------------------|------|------|------|------|------|------|------|------|------|------|------|------|------|-------|------|
| DMSO              | 57.6 | 60.9 | 60.8 | 17.5 | 17.6 | 10   | 17.7 | 16.5 | 19.7 | 7.26 | 3.52 | 3.75 | 0.19 | 0.049 | 0.71 |
| KPT330            | 42.5 | 47.7 | 49.4 | 8.34 | 7.68 | 6.84 | 41.9 | 35.5 | 37.7 | 6.28 | 5.1  | 1.73 | 0.42 | 0.29  | 2.25 |

| <b>PEDS_0022_T</b> | G1   |      |      | S    |      |      | G2   |      |      | < G1 |      |      | > G2 |      |      |
|--------------------|------|------|------|------|------|------|------|------|------|------|------|------|------|------|------|
| DMSO               | 67.3 | 40.7 | 64.1 | 10.9 | 26.3 | 13   | 10.2 | 13   | 13.9 | 3.97 | 13.4 | 7.31 | 0.61 | 0.85 | 0.51 |
| KPT330             | 54.5 | 70.4 | 50   | 3.84 | 2.17 | 4.29 | 35.6 | 25.2 | 32.2 | 1.52 | 2.2  | 7.06 | 0.19 | 1.62 | 0.94 |

| <b>Aflac_2377T</b> | G1   |      | S    |      | G2   |      | <G1  |      | >G2  |      |
|--------------------|------|------|------|------|------|------|------|------|------|------|
| DMSO               | 52.5 | 55.7 | 18   | 16.8 | 13.6 | 14.5 | 9.47 | 8.28 | 1.48 | 1.86 |
| KPT330             | 52.9 | 61.6 | 7.83 | 5.86 | 24   | 21.3 | 10.7 | 8.86 | 0.53 | 0.76 |

**Supp Table 4 - Primer Sequences**

| <b>Name</b>         | <b>Sequence</b>                                              | <b>Type</b>         |
|---------------------|--------------------------------------------------------------|---------------------|
| shTRIP13-1 Fwd      | CCGGCGATTATGTGATGACAACCTTTCTCGAGAAAGTTGTCATCACATAATCGTTTTTTG | shRNA               |
| shTRIP13-1 Rev      | AATTCAAAAACGATTATGTGATGACAACCTTTCTCGAGAAAGTTGTCATCACATAATCG  | shRNA               |
| shTRIP13-2 Fwd      | CCGGGCACTGTTGCACTTCACATTTCTCGAGAAATGTGAAGTGCAACAGTGCTTTTTTG  | shRNA               |
| shTRIP13-2 Rev      | AATTCAAAAAGCACTGTTGCACTTCACATTTCTCGAGAAATGTGAAGTGCAACAGTGC   | shRNA               |
| shTRIP13-3 Fwd      | CCGGCACCTGTAATCCCAGCACTTTCTCGAGAAAGTGCTGGGATTACAGGTGTTTTTTG  | shRNA - 3'UTR       |
| shTRIP13-3 Rev      | AATTCAAAAACACCTGTAATCCCAGCACTTTCTCGAGAAAGTGCTGGGATTACAGGTG   | shRNA - 3'UTR       |
| shTRIP13-2 Ctrl Fwd | CCGGGCACTGTTGTGCTTCACATTTCTCGAGAAATGCAAAGTGCAACAGTGCTTTTTTG  | shRNA Control       |
| shTRIP13-2 Ctrl Rev | AATTCAAAAAGCACTGTTAGTCTTCACATTTCTCGAGAAATGTGAGCAGCAACAGTGC   | shRNA Control       |
| TRIP13 Fwd          | CGTGCTGATTGATGAGGTGG                                         | qRTPCR              |
| TRIP13 Rev          | ACGTGATCTTCTCGGTGAT                                          | qRTPCR              |
| shXPO1 Ctrl Fwd     | CCGGGCTCAAGTTCTACTGACACATCTCGAGGCTCAAGTTCTACTGACACAT TTTTTG  | shRNA               |
| shXPO1 Ctrl Rev     | AATTCAAAAAGCTCAAGTTCTACTGACACATCTCGAGGCTCAAGTTCTACTGACACAT   | shRNA               |
| shXPO1 Fwd          | CCGGGCTCAAGAAGTACTGACACATCTCGAGGCTCAAGAAGTACTGACACAT TTTTTG  | shRNA               |
| shXPO1 Rev          | AATTCAAAAAGCTCAAGAAGTACTGACACATCTCGAGGCTCAAGAAGTACTGACACAT   | shRNA               |
| TBP Fwd             | TTCGGAGAGTTCTGGGATTGTA                                       | qRTPCR housekeeping |
| TBP Rev             | TGGACTGTTCTTCACTCTTGGC                                       | qRTPCR housekeeping |
| XPO1 Fwd            | GCAGTTGGTTCAATCTCTGGTAAT                                     | qRTPCR              |
| XPO1 Rev            | AAATCAAGCAGCTGACGAGC                                         | qRTPCR              |
