# Supplementary material for: Targeting TRIP13 in favorable histology Wilms tumor with nuclear export inhibitors synergizes with doxorubicin
Source: PubMed Central journal article supplement (PMC11001930; doi:10.1038/s42003-024-06140-6), 2024-04-08
Supplement: 42003_2024_6140_MOESM3_ESM.pdf [file 42003_2024_6140_MOESM3_ESM.pdf]

## Description of Additional Supplementary Files

**File name:** Supplementary Data 1

**Description:** Alterations.

**File name:** Supplementary Data 2

**Description:** Screen Data.

**File name:** Supplementary Data 3

**Description:** PEDS\_0041\_T1 comparison of KPT330 treated cells vs DMSO control.

**File name:** Supplementary Data 4

**Description:** KPTvDMSO GSEA Hallmarks.

**File name:** Supplementary Data 5

**Description:** shTRIP13 differentially expressed genes.

**File name:** Supplementary Data 6

**Description:** shTRIP13 vs shControl GSEA Hallmarks.

**File name:** Supplementary Data 7

**Description:** Differentially Expressed Genes in shTRIP13 and KPT330 Conditions.

**File name:** Supplementary Data 8

**Description:** The source data behind the graphs in the paper.
